# Supplementary material for: Galanin enhances systemic glucose metabolism through enteric Nitric Oxide Synthase-expressed neurons
Source: PubMed Central journal article supplement — Mol Metab. 2018 Jan 31;10:100–8. doi: 10.1016/j.molmet.2018.01.020 (PMC5985240; doi:10.1016/j.molmet.2018.01.020), 2018-01-31
Supplement: mmc2.pdf [file mmc2.pdf]

| <b>Gene of interest</b>     | <b>Sequence Forward</b> | <b>Sequence Reverse</b>  |
|-----------------------------|-------------------------|--------------------------|
| <b>beta-2-microglobulin</b> | CACTGACCGGCCTGTATGC     | GGGTGGCGTGAGTATACTTGAATT |
| <b>G6pase</b>               | ACGTATGGATTCCGGTGTTTG   | CAGCTGCACAGCCCAGAA       |
| <b>Glut2</b>                | TGGAAGGATCAAAGCAATGTTG  | CATCAAGAGGGCTCCAGTCAA    |
| <b>Glut4</b>                | AAAAGTGCCTGAAACCAGAG    | TCACCTCCTGCTCTAAAAGG     |
| <b>Pepck</b>                | ATGTTCCGGGCGGATTGAAG    | TCAGGTTCAAGGCGTTTTCC     |
| <b>Sgl1</b>                 | TCCCGTATGATCACTGAGTTTGC | GGCAGTTGCTGGGTTCCAT      |
| <b>eNos</b>                 | GTGGTGACCAGCACATTTGGC   | GCCTGACATTTCCATGAGCGC    |
