# Supplementary figures and images for: Galanin enhances systemic glucose metabolism through enteric Nitric Oxide Synthase-expressed neurons
Source: PubMed Central journal article supplement — Mol Metab. 2018 Jan 31;10:100–8. doi: 10.1016/j.molmet.2018.01.020 (PMC5985240; doi:10.1016/j.molmet.2018.01.020), 2018-01-31

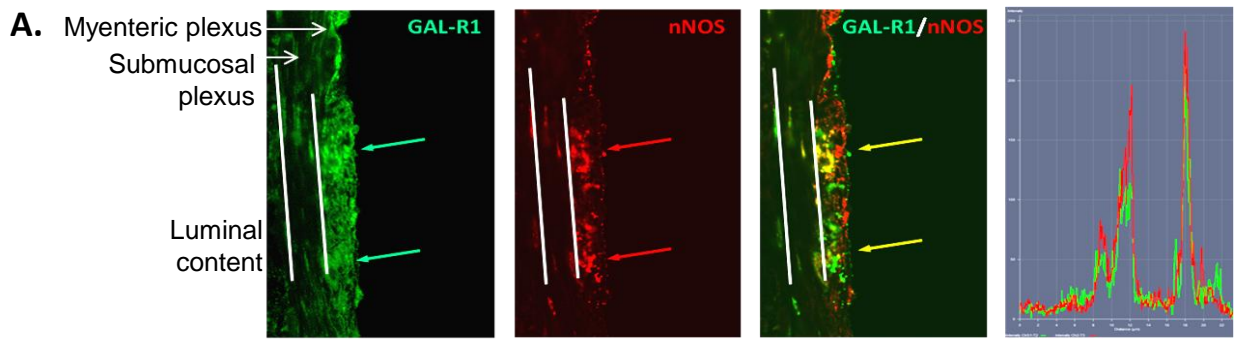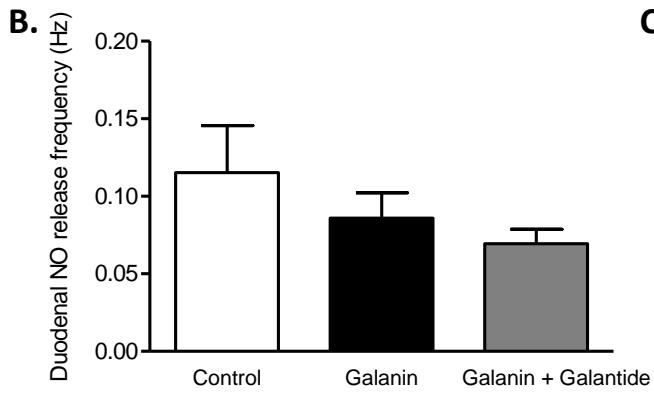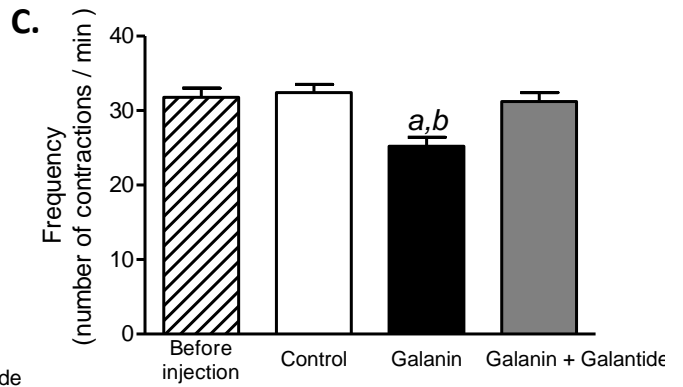

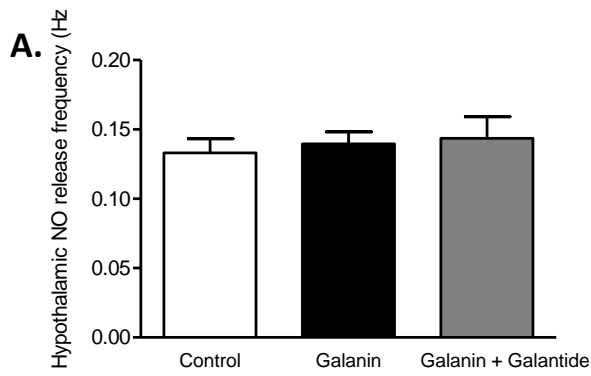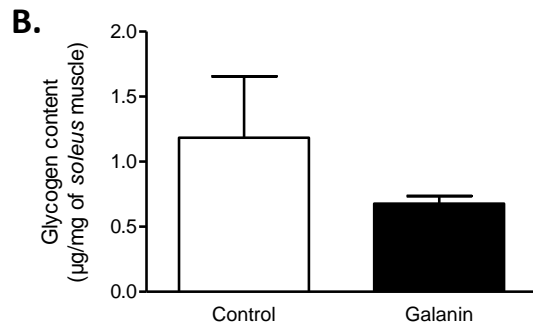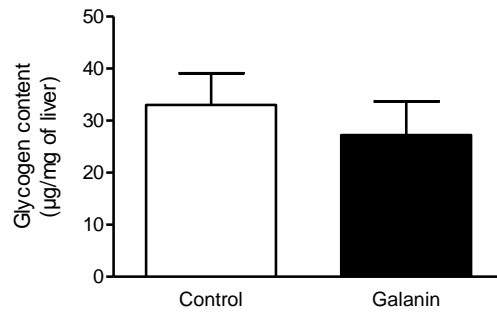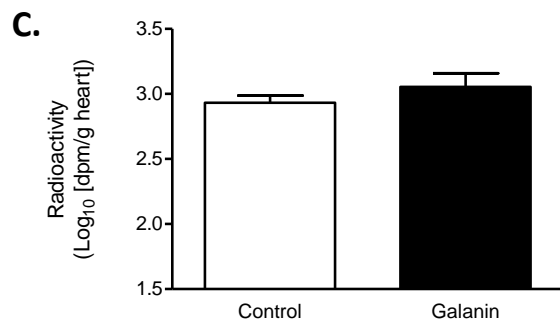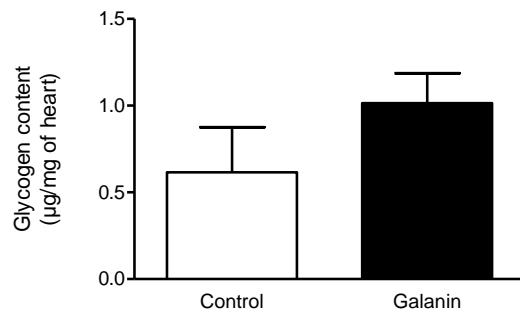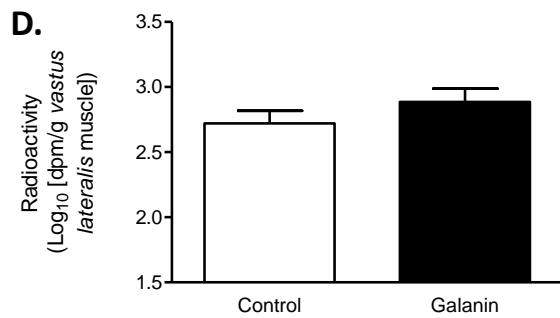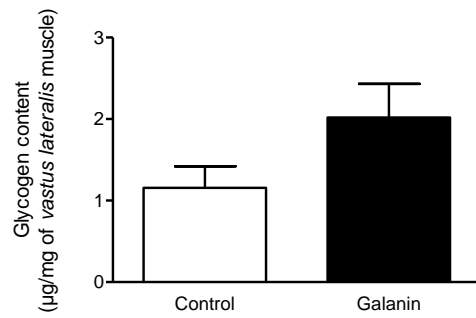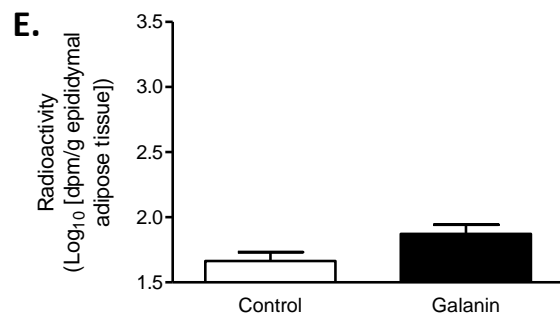

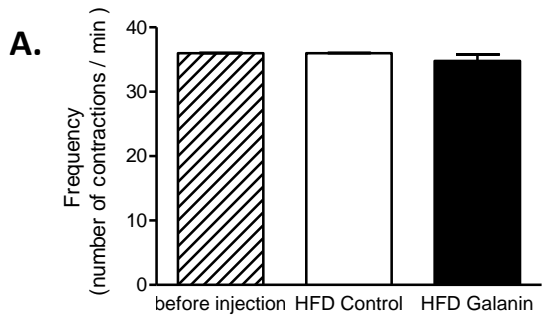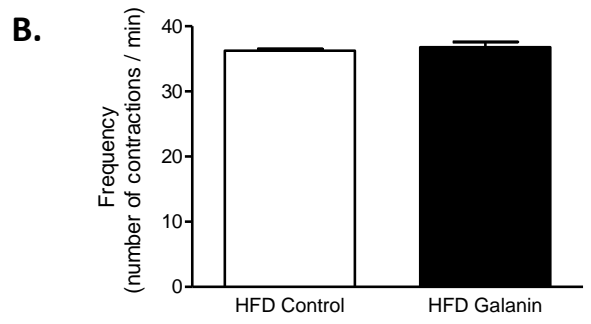

**A.**

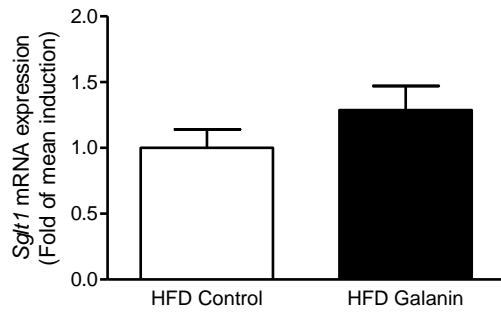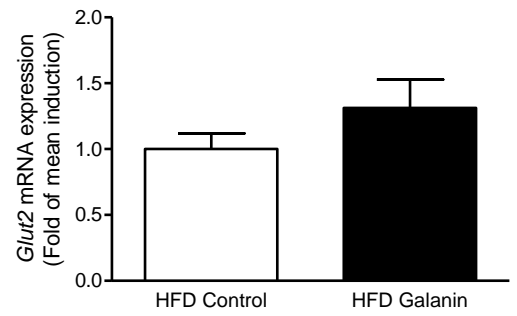

**B.**

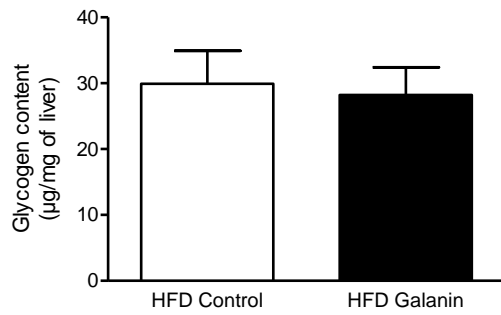

**C.**

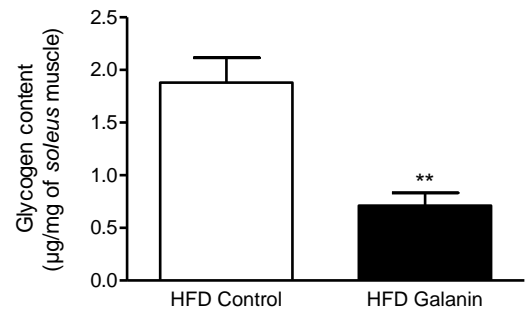

Supplement: mmc1.pdf [file mmc1.pdf]
